# Supplementary material for: Global Profile of tRNA-Derived Small RNAs in Pathological Cardiac Hypertrophy Plasma and Identification of tRF-21-NB8PLML3E as a New Hypertrophy Marker
Source: MDPI journal article supplement (doi:10.3390/diagnostics13122065), 2023-06-14
Supplement: s1 [file s1]

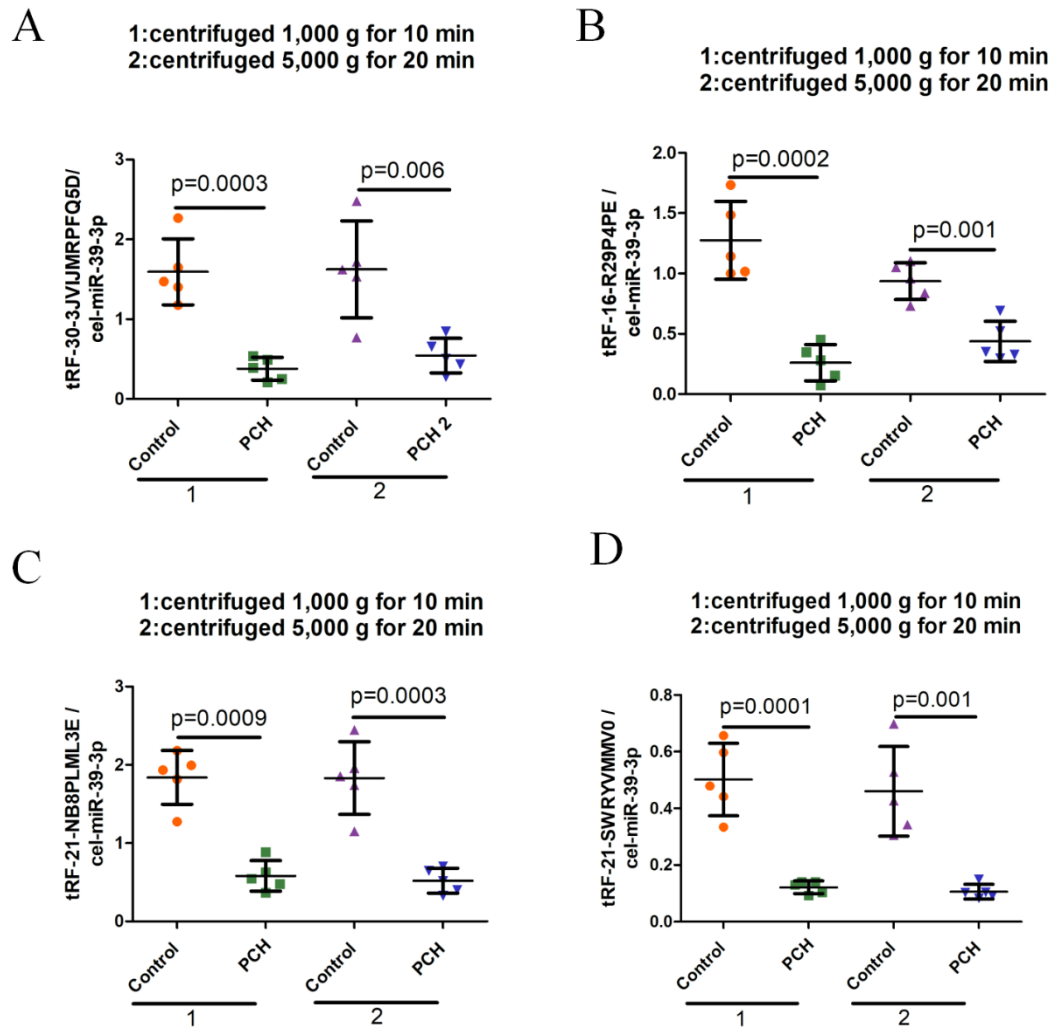

**Figure S1** The relative expression of the 4 down-regulated tsRNAs of 5 PCH patients and 5 healthy volunteers. Two plasma samples were collected in each group. 1: centrifuged 1,000 g for 10 min; 2: centrifuged 5,000 g for 20 min.  $p < 0.05$  was considered statistically significant.

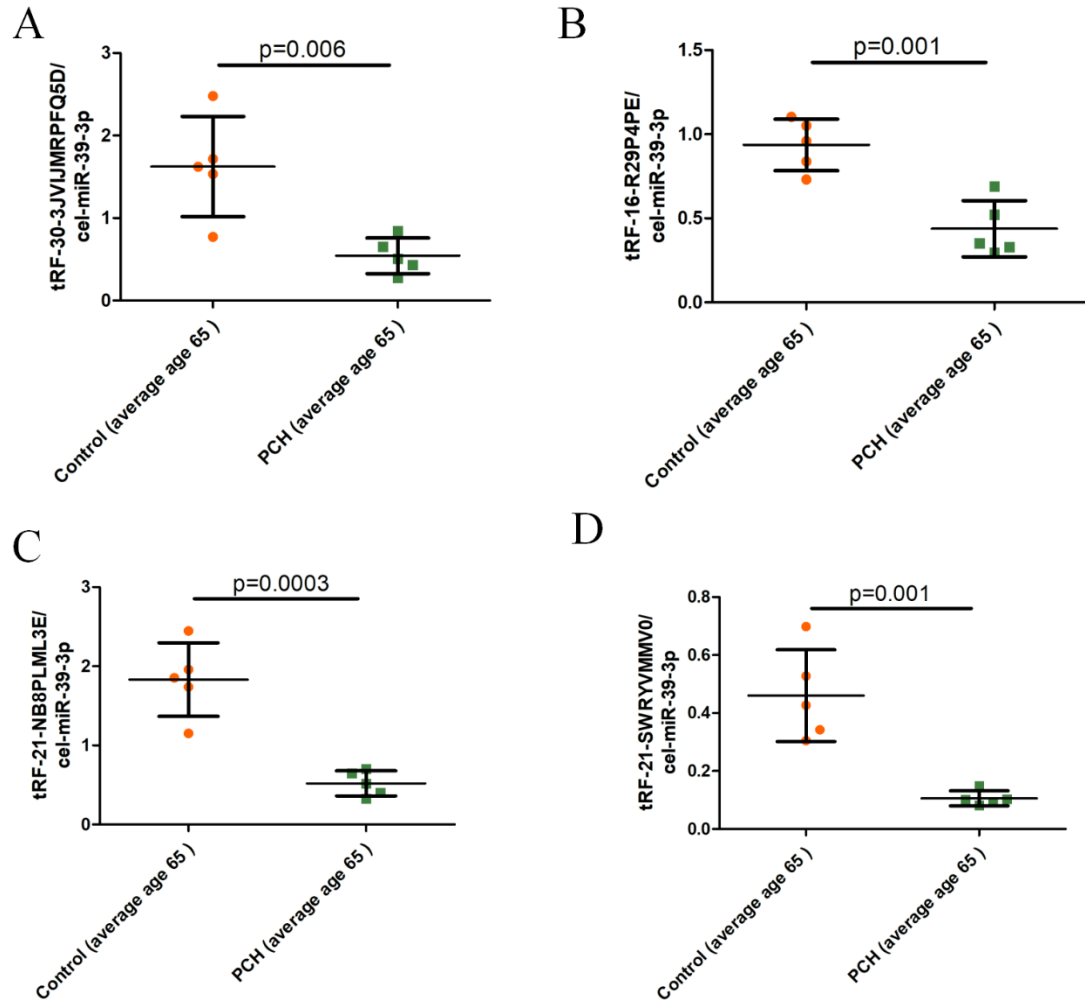

**Figure S2** The relative expression of the 4 down-regulated tsRNAs of 5 PCH patients (with the average age 65) and 5 healthy volunteers (with the average age 65).  $p<0.05$  was considered statistically significant.
