# Supplementary material for: Global Profile of tRNA-Derived Small RNAs in Pathological Cardiac Hypertrophy Plasma and Identification of tRF-21-NB8PLML3E as a New Hypertrophy Marker
Source: MDPI journal article supplement (doi:10.3390/diagnostics13122065), 2023-06-14
Supplement: s1 [file s1]

**Table S1 The primer sequences.**

| ncRNA                      | Primer sequence                        |
|----------------------------|----------------------------------------|
| <i>cel-miR-39-3p</i>       | non-disclosure agreement(ribobio,Inc.) |
| <i>U6</i>                  | 5'-CGCTTCGGCACATATAC-3'                |
|                            | 5'-TTCACGAATTTGCGTGTTCATC-3'           |
| <i>tRF-30-3JVIJMRPFQ5D</i> | 5'-CCGGCTAGCTCAGTCGGTAGA-3'            |
|                            | 5'-TATGGTTGTTTCACGACTCCTTCAC-3'        |
| <i>tRF-16-R29P4PE</i>      | 5'-CTCAGGTTGTGGGGATGTAGCT-3'           |
|                            | 5'-TATGGTTGTTTCACGACTCCTTCAC-3'        |
| <i>tRF-21-NB8PLML3E</i>    | 5'-CAGGTTGTCTGAATCCTTCAC-3'            |
|                            | 5'-TATGGTTGTTTCACGACTCCTTCAC-3'        |
| <i>tRF-21-SWRYVMMV0</i>    | 5'-GCTACGCGTCGTGGTTGTAGT-3'            |
|                            | 5'-TATGGTTGTTTCACGACTCCTTCAC-3'        |

**Table S2 Baseline characteristics.**

| characteristics                      | Sequencing samples |                   | all clinical samples collected |                      | <i>p</i> value    |
|--------------------------------------|--------------------|-------------------|--------------------------------|----------------------|-------------------|
|                                      | CON ( <i>n</i> =4) | PCH( <i>n</i> =4) | CON ( <i>n</i> =25)            | PCH( <i>n</i> =35)   |                   |
| Age (years)                          | 49.25              | 56                | <b>50.08±7.5051</b>            | <b>65.4±15.1758</b>  | <b>&lt;0.0001</b> |
| Female, <i>n</i> (%)                 | 0 (0%)             | 0 (0%)            | 6 (24%)                        | 9 (25.7%)            | 0.8798            |
| Body surface area (m <sup>2</sup> )  | 1.786              | 1.8332            | 1.7776±0.147                   | 1.7923±0.2319        | 0.7846            |
| Body mass index (kg/m <sup>2</sup> ) | 23.5835            | 26.0524           | 24.302±3.11                    | 25.9447±4.9706       | 0.1575            |
| Smoking (%)                          | 2 (50%)            | 4 (100%)          | 6 (24%)                        | 14 (40%)             | 0.1949            |
| Drinking (%)                         | 3 (75%)            | 2 (50%)           | 6 (24%)                        | 9 (25.7%)            | 0.8798            |
| Co-morbidities                       |                    |                   |                                |                      |                   |
| Diabetes mellitus, <i>n</i> (%)      | 0 (0%)             | 4 (100%)          | <b>1 (4%)</b>                  | <b>13 (37.1429%)</b> | <b>0.0028</b>     |
| Hypertension, <i>n</i> (%)           | 0 (0%)             | 2 (50%)           | <b>5 (20%)</b>                 | <b>28 (80%)</b>      | <b>&lt;0.0001</b> |
| Dyslipidaemia, <i>n</i> (%)          | 0 (0%)             | 1 (25%)           | 1 (4%)                         | 5 (14.3%)            | 0.3827            |

CON: control; PCH: pathological cardiac hypertrophy

**Table S3 ROC curve of significantly down-regulated tsRNA of PCH.**

| tsRNA                      | course of PCH          | AUC    | SEM    | <i>p</i> value | 95% CI           | <i>Cutoff</i> value | Sensitivity% | Specificity% |
|----------------------------|------------------------|--------|--------|----------------|------------------|---------------------|--------------|--------------|
| <i>tRF-30-3JVIJMRPFQ5D</i> | PCH                    | 0.7423 | 0.0628 | 0.0015         | 0.6192 to 0.8654 | 0.0423              | 42.86        | 96.00        |
|                            | Concentric hypertrophy | 0.7893 | 0.0772 | 0.0024         | 0.6381 to 0.9406 | 0.0409              | 46.67        | 96.00        |
|                            | Eccentric hypertrophy  | 0.6926 | 0.0831 | 0.0302         | 0.5297 to 0.8555 | 0.0423              | 36.84        | 96.00        |
| <i>tRF-16-R29P4PE</i>      | PCH                    | 0.7497 | 0.0652 | 0.0011         | 0.6219 to 0.8775 | 0.0228              | 17.14        | 96.00        |
|                            | Concentric hypertrophy | 0.7825 | 0.0717 | 0.0025         | 0.6419 to 0.9231 | 0.0539              | 50.00        | 92.00        |
|                            | Eccentric hypertrophy  | 0.7156 | 0.0788 | 0.0169         | 0.5610 to 0.8701 | 0.0219              | 16.67        | 96.00        |
| <i>tRF-21-NB8PLML3E</i>    | PCH                    | 0.7726 | 0.0614 | 0.0003         | 0.6522 to 0.8930 | 0.0049              | 25.71        | 96.00        |
|                            | Concentric hypertrophy | 0.8475 | 0.0621 | 0.0002         | 0.7258 to 0.9692 | 0.0049              | 37.50        | 96.00        |
|                            | Eccentric hypertrophy  | 0.7129 | 0.0792 | 0.0204         | 0.5578 to 0.8681 | 0.0049              | 17.65        | 96.00        |
| <i>tRF-21-SWRYVMMV0</i>    | PCH                    | 0.8360 | 0.0511 | <0.0001        | 0.7359 to 0.9361 | 0.0324              | 57.14        | 96.00        |
|                            | Concentric hypertrophy | 0.8825 | 0.0603 | <0.0001        | 0.7644 to 1.000  | 0.0308              | 62.50        | 96.00        |
|                            | Eccentric hypertrophy  | 0.7867 | 0.0740 | 0.0015         | 0.6417 to 0.9317 | 0.0308              | 50.00        | 96.00        |

AUC: area under curve; CI: confidence interval; PCH: pathological cardiac hypertrophy; ROC: receiver operating characteristic; SEM: standard

error of mean; tsRNA: tRNA-derived small RNAs.  $p < 0.05$  was regarded as significant.

**Table S4 Pearson correlation coefficients of significantly decreased tsRNA and clinical parameters of PCH.**

| tsRNA                      | course of PCH          | IVS (mm)       |                | LVPWd (mm)     |                | LVEDD (mm)     |                | LVEF (%)       |                |
|----------------------------|------------------------|----------------|----------------|----------------|----------------|----------------|----------------|----------------|----------------|
|                            |                        | <i>r</i> value | <i>p</i> value |
| <i>tRF-30-3JVIJMRPFQ5D</i> | PCH                    | -0.0889        | 0.6172         | <b>-0.4227</b> | <b>0.0128</b>  | 0.1151         | 0.5169         | -0.2953        | 0.0900         |
|                            | Concentric hypertrophy | -0.2991        | 0.2788         | -0.2298        | 0.4101         | 0.3010         | 0.2756         | -0.3234        | 0.2397         |
|                            | Eccentric hypertrophy  | 0.3208         | 0.1805         | <b>-0.7521</b> | <b>0.0002</b>  | -0.0958        | 0.6965         | -0.2598        | 0.2827         |
| <i>tRF-16-R29P4PE</i>      | PCH                    | -0.0459        | 0.7968         | <b>-0.4517</b> | <b>0.0083</b>  | 0.0064         | 0.9712         | -0.1777        | 0.3148         |
|                            | Concentric hypertrophy | -0.0533        | 0.8447         | -0.3482        | 0.2035         | 0.2663         | 0.3188         | -0.3062        | 0.2487         |
|                            | Eccentric hypertrophy  | 0.4104         | 0.0907         | <b>-0.6063</b> | <b>0.0076</b>  | -0.3874        | 0.1122         | 0.0587         | 0.8170         |
| <i>tRF-21-NB8PLML3E</i>    | PCH                    | -0.1906        | 0.2880         | <b>-0.5567</b> | <b>0.0009</b>  | 0.3223         | 0.0674         | <b>-0.4630</b> | <b>0.0067</b>  |
|                            | Concentric hypertrophy | -0.0556        | 0.8381         | -0.3689        | 0.1761         | 0.2821         | 0.2898         | -0.4513        | 0.0793         |
|                            | Eccentric hypertrophy  | 0.0787         | 0.7640         | <b>-0.6172</b> | <b>0.0083</b>  | 0.1368         | 0.6006         | -0.3712        | 0.1424         |
| <i>tRF-21-SWRYVMMV0</i>    | PCH                    | -0.1067        | 0.5482         | <b>-0.4223</b> | <b>0.0144</b>  | 0.1975         | 0.2628         | -0.3400        | 0.0613         |
|                            | Concentric hypertrophy | -0.2424        | 0.3657         | -0.3670        | 0.1784         | 0.3847         | 0.1412         | -0.4589        | 0.0738         |
|                            | Eccentric hypertrophy  | 0.4332         | 0.0725         | <b>-0.7020</b> | <b>0.0017</b>  | -0.0681        | 0.7885         | -0.1578        | 0.5316         |

IVS: the thickness of the interventricular septum; LVEDD: left ventricular end-diastolic diameter; LVPWd: left ventricular posterior wall dimensions;

LVEF: left ventricular ejection fraction; PCH: pathological cardiac hypertrophy.  $p < 0.05$  was regarded as significant.
